# Supplementary material for: Effects of Gas‐Diffusion Layers and Water Management on the Carbon Corrosion of a Catalyst Layer in Proton‐Exchange Membrane Fuel Cells
Source: Hindawi journal article supplement (doi:10.1155/2024/7961519), 2024-01-01
Supplement: f1 [file 7961519.f1.pdf]

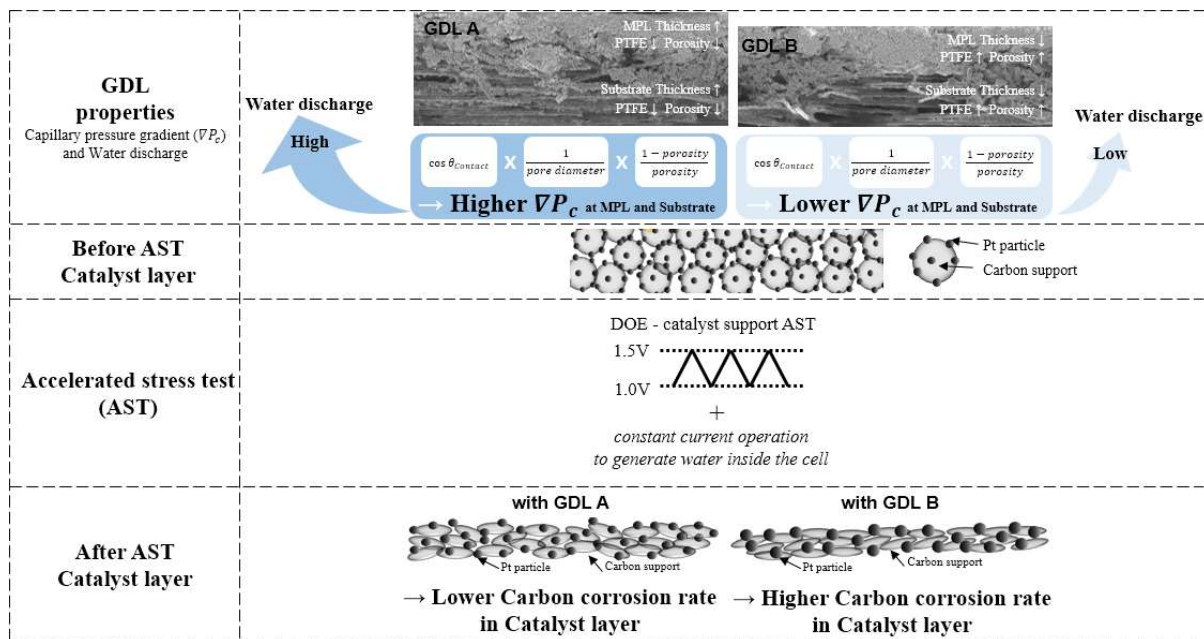

Figure S1: An overview of the effects of water management in GDLs on carbon corrosion rate in the catalyst layer.

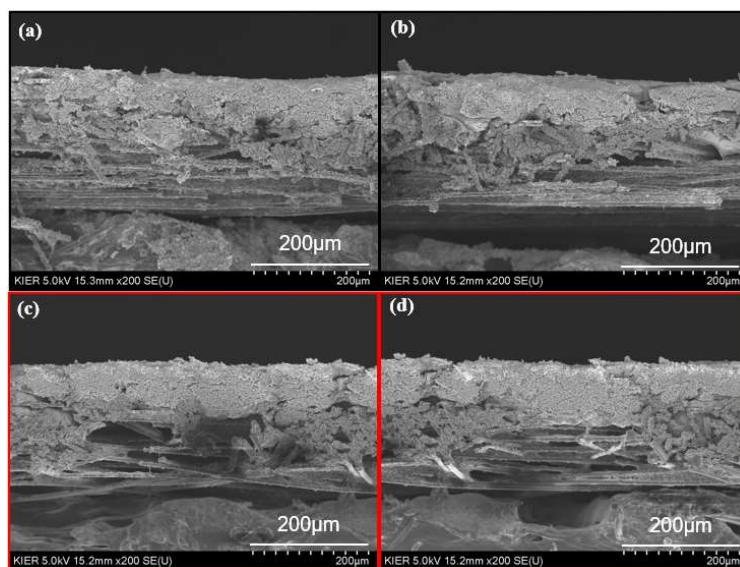

Figure S2: SEM images of fresh GDLs measured twice (a) GDL A 1st, (b) GDL A 2nd, (c) GDL B 1st, and (d) GDL B 2nd.

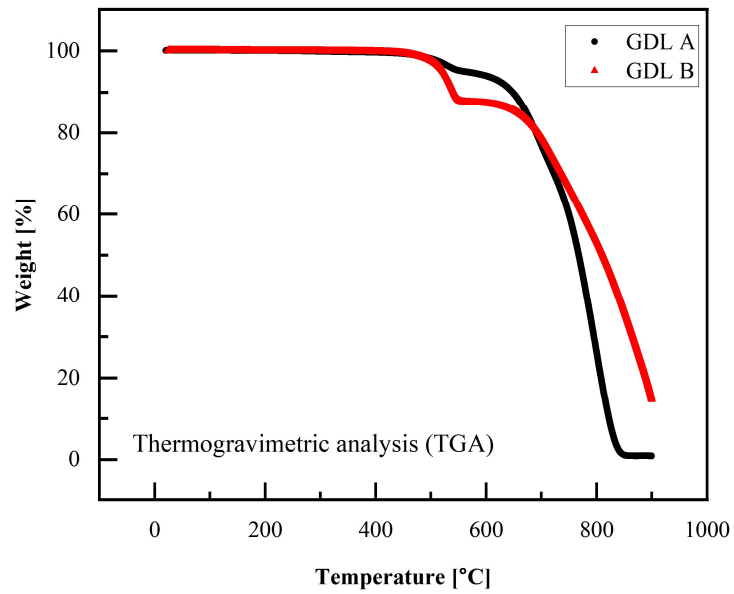

Figure S3: TGA curves of GDL A and GDL B in nitrogen for a heating rate of  $10\text{ }^{\circ}\text{C min}^{-1}$ .

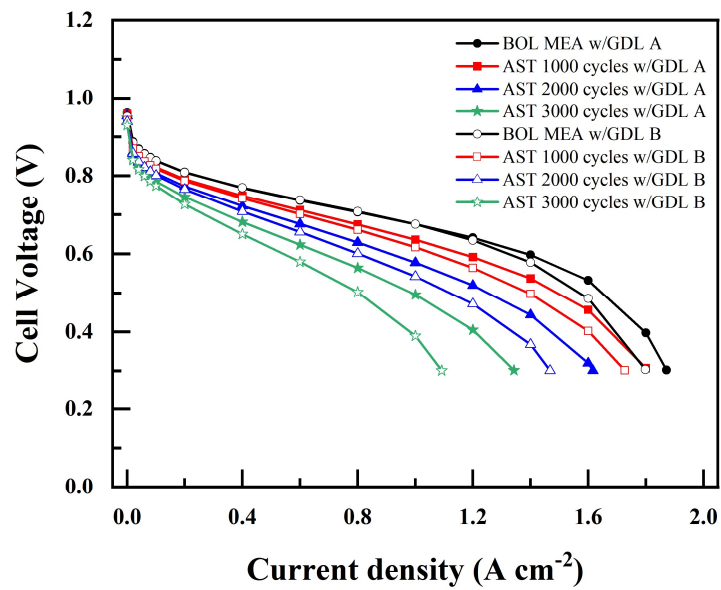

Figure S4: Polarization curves obtained over 3,000 cycles using the modified AST.
